# Supplementary material
Source: PubMed Central journal article supplement (PMC2732896)
Supplement: 0902437106_ST2_PDF.pdf [file 0902437106_ST2_PDF.pdf]

Table S2: Dates in which rifampicin and isoniazid treatments were introduced and the year of sampling for each data set considered.

| Country   | Timelines         |            |             |           |
|-----------|-------------------|------------|-------------|-----------|
|           | National TB prog. | Isoniazid* | Rifampicin* | Sampling  |
| Venezuela | 1936              | 1950       | 1982        | 1998-1999 |
| Cuba      | 1963              | 1950       | 1982        | 1994-1995 |
| Estonia   | 1997              | 1956       | 1972        | 1994      |

\* The years of antibiotic introduction given in the table are taken from the World Health Organization [4].
