# Supplementary material
Source: PubMed Central journal article supplement (PMC2732896)
Supplement: 0902437106_ST4_PDF.pdf [file 0902437106_ST4_PDF.pdf]

Table S4: The vector  $\psi_0$  for each dataset, used in the estimation of  $\text{Var}(T_k(y))$ .

| Data set                 | $\psi_0 = (\alpha_0, \mu_0, c_0, \rho_0)$ |
|--------------------------|-------------------------------------------|
| Cuba (IS6110)            | (0.70, 0.10, 0.20, 0.03)                  |
| Cuba (spoligotypes)      | (0.70, 0.02, 0.20, 0.05)                  |
| Estonia (IS6110)         | (0.70, 0.10, 0.50, 0.10)                  |
| Venezuela (spoligotypes) | (0.70, 0.02, 0.20, 0.02)                  |
