# Supplementary material
Source: PubMed Central journal article supplement (PMC2732896)
Supplement: 0902437106_ST5_PDF.pdf [file 0902437106_ST5_PDF.pdf]

Table S5: Point estimates and credibility intervals for mutation and transmission rates, and for the proportion of isolates that are drug resistant.

| Parameter                        | Data set            | Mean   | Median | 95% CI           |
|----------------------------------|---------------------|--------|--------|------------------|
| Mutation $\mu$<br>(IS6110)       | Cuba                | 0.0685 | 0.0630 | (0.0056, 0.1474) |
|                                  | Estonia             | 0.0882 | 0.0864 | (0.0099, 0.1795) |
| Mutation $\mu$<br>(spoligotypes) | Cuba                | 0.0133 | 0.0101 | (0.0001, 0.0361) |
|                                  | Venezuela           | 0.0029 | 0.0022 | (0.0000, 0.0079) |
| Transmission $\alpha$            | Cuba (IS6110)       | 0.6632 | 0.6568 | (0.6362, 0.7100) |
|                                  | Cuba (spoligotypes) | 0.6605 | 0.6545 | (0.6307, 0.7042) |
|                                  | Estonia             | 0.6707 | 0.6646 | (0.6383, 0.7188) |
|                                  | Venezuela           | 0.6898 | 0.6869 | (0.6713, 0.7137) |
| Proportion resistant             | Cuba (IS6110)       | 0.0674 | 0.0568 | (0.0218, 0.1515) |
|                                  | Cuba (spoligotypes) | 0.0884 | 0.0733 | (0.0211, 0.2222) |
|                                  | Estonia             | 0.2181 | 0.2143 | (0.1382, 0.3192) |
|                                  | Venezuela           | 0.0210 | 0.0144 | (0.0044, 0.0606) |
